# Supplementary material for: Assessment of the Local Tomato Landraces as Gene Conservation Reservoirs – Comparative Studies with an Industrial Hybrid
Source: Research Square preprint supplement (doi:10.21203/rs.3.rs-7107642/v1), 2025-07-23
Supplement: Supplementary file 1 [file bf2db402f79bef59f0a7d534.docx]

**Supplementary online materials**

Statistical analyses of tomato landraces and hybrids vegetative and generative parameters, significant p values are green marked in tables.

**Table S1.** Plants height parameters statistically analyses

**Table S2.** Leaf number parameters statistically analyses

**Table S3.** Number of flowers parameters statistically analyses

**Table S4.** Flower-set parameters statistically analyses

**Table S5.** Fruit width parameters statistically analyses

**Table S6.** Fruit length parameters statistically analyses


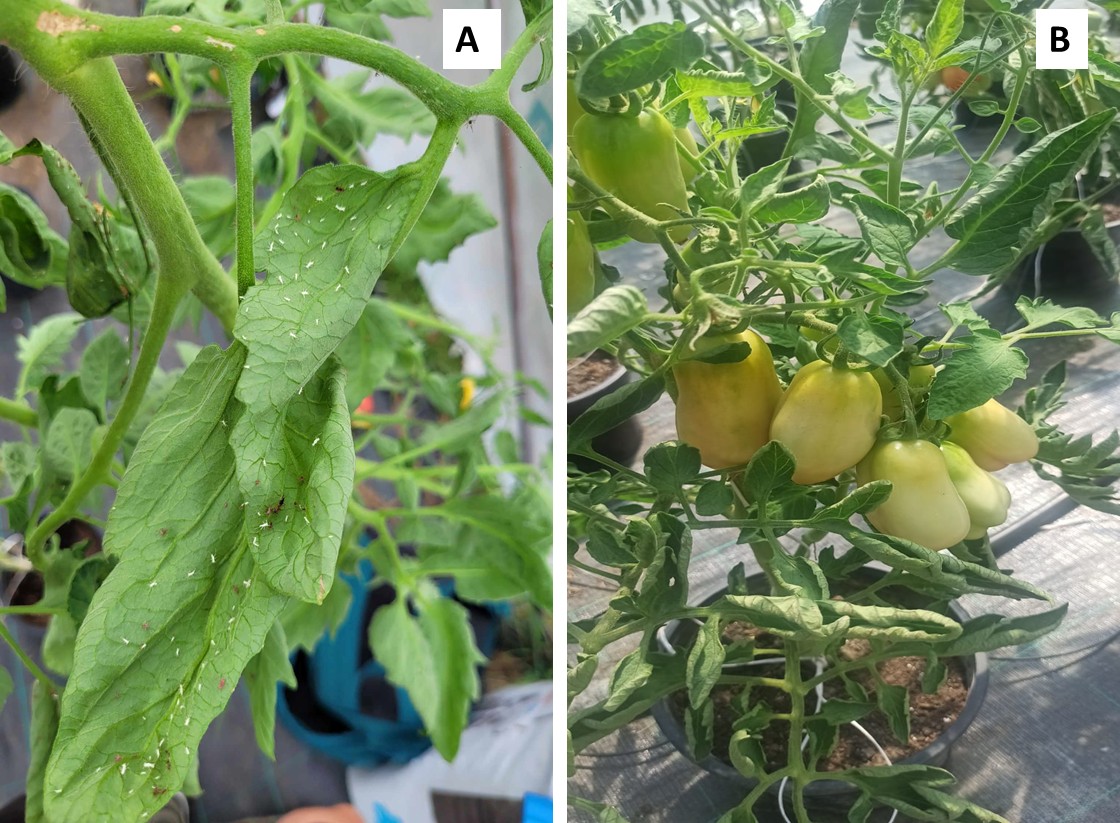


**Figure S1.** Glasshouse whitefly (*Trialeurodes vaporariorum*) exuvia on Hybrid (A), and landrace without pests and diseases (B).
